# Supplementary material
Source: Springer Nature journal article supplement (https://www.springermedizin.de/resource/supplementary/12911_2009_892_MOESM3_ESM.pdf/9527560)
Supplement: MOESM3 [file 9527560]

Hämta...

Rensa

19 400116-7743

Lkm

Olivia Grönberg

66 år

Sök

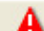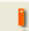P  
G

## Läkemedelslista: 19 400116-7743 Lkm Olivia Grönberg

Vårdkontakt: Vårdtillfälle, 2006-08-21, Medicinkliniken LiM

Vårdgivare: Reinicke, Erik (vårdenhetschef)

Vårdenhet: Avd 7 HIA:Medklin LiM:NSV

FASS...

Info

www.fass.se...

e-dos...

 Patienten har en läkemedelslista i ApoDos-systemet

Aktuell ordination | Tidigare ordination

 Visa samtliga aktuella ordinationer

Stående, tidsbegränsade och planerade ordinationer

|  | Ordnation                                      | Dosering                                                        | Vårdenhet                 | Indikation       |
|--|------------------------------------------------|-----------------------------------------------------------------|---------------------------|------------------|
|  | NOVORAPID FLEXPEN INJV FÖRF PEN 100 E/ML       | 10 Enheter kl 07:30 + 20 Enheter kl 12:00 + 5 Enheter kl 17:00. | Avd 7 HIA:Medklin LiM:NSV | Diabetes typ 1   |
|  | WARAN TABL 2.5 MG                              | enligt schema.                                                  | Avd 7 HIA:Medklin LiM:NSV | blodförtunnande  |
|  | BEHEPAN FILMDRAG TABL 1 MG                     | 1 tablett 1 ggr dagligen.                                       | Avd 7 HIA:Medklin LiM:NSV | indikation 2     |
|  | FURIX TABL 40 MG                               | 1 tablett 1 ggr dagligen.                                       | Avd 7 HIA:Medklin LiM:NSV | Svullna ben      |
|  | ATENOLOL NM PHARMA TABL 50 MG                  | 2 tabletter 1 ggr dagligen.                                     | Avd 7 HIA:Medklin LiM:NSV | Hypertoni        |
|  | ADALAT OROS DEPOTTABL 60 MG                    | 3 tabletter på morgonen, till lunch och till kvällen.           | Avd 7 HIA:Medklin LiM:NSV | indikation 2     |
|  | KÅVEPENIN FILMDRAG TABL 1 G                    | 1 tablett 3 ggr dagligen.                                       | Avd 7 HIA:Medklin LiM:NSV | Lunginflammation |
|  | PULMICORT TURBUHALER INHAL-PULV 400 MIKROG/DOS | 1 inhalation på morgonen och till kvällen.                      | Avd 7 HIA:Medklin LiM:NSV | Astma            |

Vid behovsordinationer

|  | Ordnation                    | Dosering                                                          | Vårdenhet                 | Indikation       | Insättn. datum | Utsättn. |
|--|------------------------------|-------------------------------------------------------------------|---------------------------|------------------|----------------|----------|
|  | PANODIL FILMDRAG TABL 500 MG | 2 tabletter 4 ggr dagligen vid behov. Högst 8 tabletter per dygn. | Avd 7 HIA:Medklin LiM:NSV | Värk i höger arm | 2006-09-14     |          |

Ändra...

Sätt ut...

Skriv ut

Ny ordination...

Ordinationslista...

Stäng
